# Supplementary material
Source: Springer Nature journal article supplement (https://www.springermedizin.de/resource/supplementary/12889_2009_1688_MOESM4_ESM.pdf/9503732)

Per cent

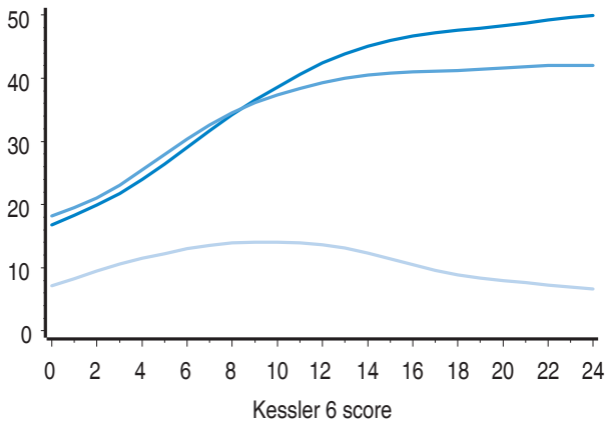

18-44 years    45-64 years    65 years and over

Supplement: MOESM4 [file 9503732]
